# Supplementary material for: Investigation into Polyurethane at Varying Dose Rates of Ionizing Radiation for Clinical Application
Source: Hindawi journal article supplement (doi:10.1155/2018/7312147), 2018-10-01
Supplement: f1 [file 7312147.f1.zip]

Archive with 2 entries (2 files):
- 7312147.f1/mat.7312147.v2.pdf
- 7312147.f1/S1 Fig_JCHEM_2379224.docx
