# Supplementary material for: Investigation into Polyurethane at Varying Dose Rates of Ionizing Radiation for Clinical Application
Source: Hindawi journal article supplement (doi:10.1155/2018/7312147), 2018-10-01
Supplement: f1 [file 7312147.f1.zip › 7312147.f1/mat.7312147.v2.pdf]

| Gy/min     | Mn (g/mol)    | Polydispersity | Refractive Index |
|------------|---------------|----------------|------------------|
| <b>3.2</b> | 45130 ± 10300 | 1.93 ± 0.12    | 1.56 ± 0.1       |
| <b>4.5</b> | 38327 ± 1400  | 1.84 ± 0.07    | 2.40 ± 0.5       |
| <b>44</b>  | 44250 ± 2900  | 1.93 ± 0.10    | 1.99 ± 0.2       |
| <b>833</b> | 40916 ± 5500  | 1.84 ± 0.13    | 2.00 ± 0.1       |
