# Supplementary figures and images for: Investigation into Polyurethane at Varying Dose Rates of Ionizing Radiation for Clinical Application
Source: Hindawi journal article supplement (doi:10.1155/2018/7312147), 2018-10-01

1.0

0.8

0.6

0.4

0.2

0.0

**Absorbance**


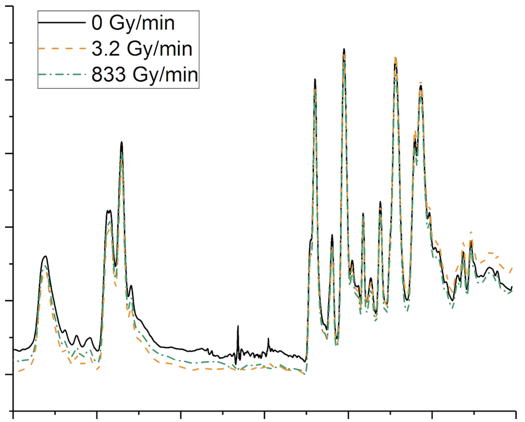
1.0


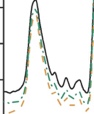


0.8

3500 3000 2500 2000 1500 1000 500

**Wavelength (cm-1)**

Supplement: f1 [file 7312147.f1.zip › 7312147.f1/S1 Fig_JCHEM_2379224.docx]
